# Supplementary material for: Picking the tyrosine-lock: chemical synthesis of the tyrosyl-DNA phosphodiesterase I inhibitor recifin A and analogues
Source: Royal Society of Chemistry journal article supplement (doi:10.1039/d4sc01976h), 2024-01-01
Supplement: d4sc01976h1.pdf [file d4sc01976h1.pdf]

## Supplementary information

### Picking the tyrosine-lock: chemical synthesis of the tyrosyl-DNA phosphodiesterase I inhibitor recifin A and analogues

*Taylor B. Smallwood<sup>a</sup>, Lauren R. H. Krumpe<sup>b</sup>, Colton D. Payne<sup>a</sup>, Victoria G. Klein<sup>c,1</sup>, Barry R. O'Keefe<sup>b,d</sup>, Richard J. Clark<sup>a</sup>, Christina I. Schroeder<sup>c,e</sup> and K. Johan Rosengren<sup>a</sup>*

<sup>a</sup> The University of Queensland, School of Biomedical Science, Brisbane QLD 4072, Australia

<sup>b</sup> Molecular Targets Program, Center for Cancer Research, National Cancer Institute, National Institutes of Health, Frederick, MD, 21702, USA

<sup>c</sup> Chemical Biology Laboratory, Center for Cancer Research, National Cancer Institute, National Institutes of Health, Frederick, MD, 21702, USA

<sup>d</sup> Natural Products Branch, Developmental Therapeutics Program, Division of Cancer Treatment and Diagnosis, National Cancer Institute, National Institutes of Health, Frederick, MD, 21702, USA

<sup>e</sup> Peptide Therapeutics, Genentech Inc. 1 DNA Way, South San Francisco, CA, 94080, CA, USA

<sup>1</sup> Current address: Laboratory of Bioorganic Chemistry, National Institute for Diabetes and Digestive Kidney Diseases, National Institutes of Health, Bethesda, MD, 20892

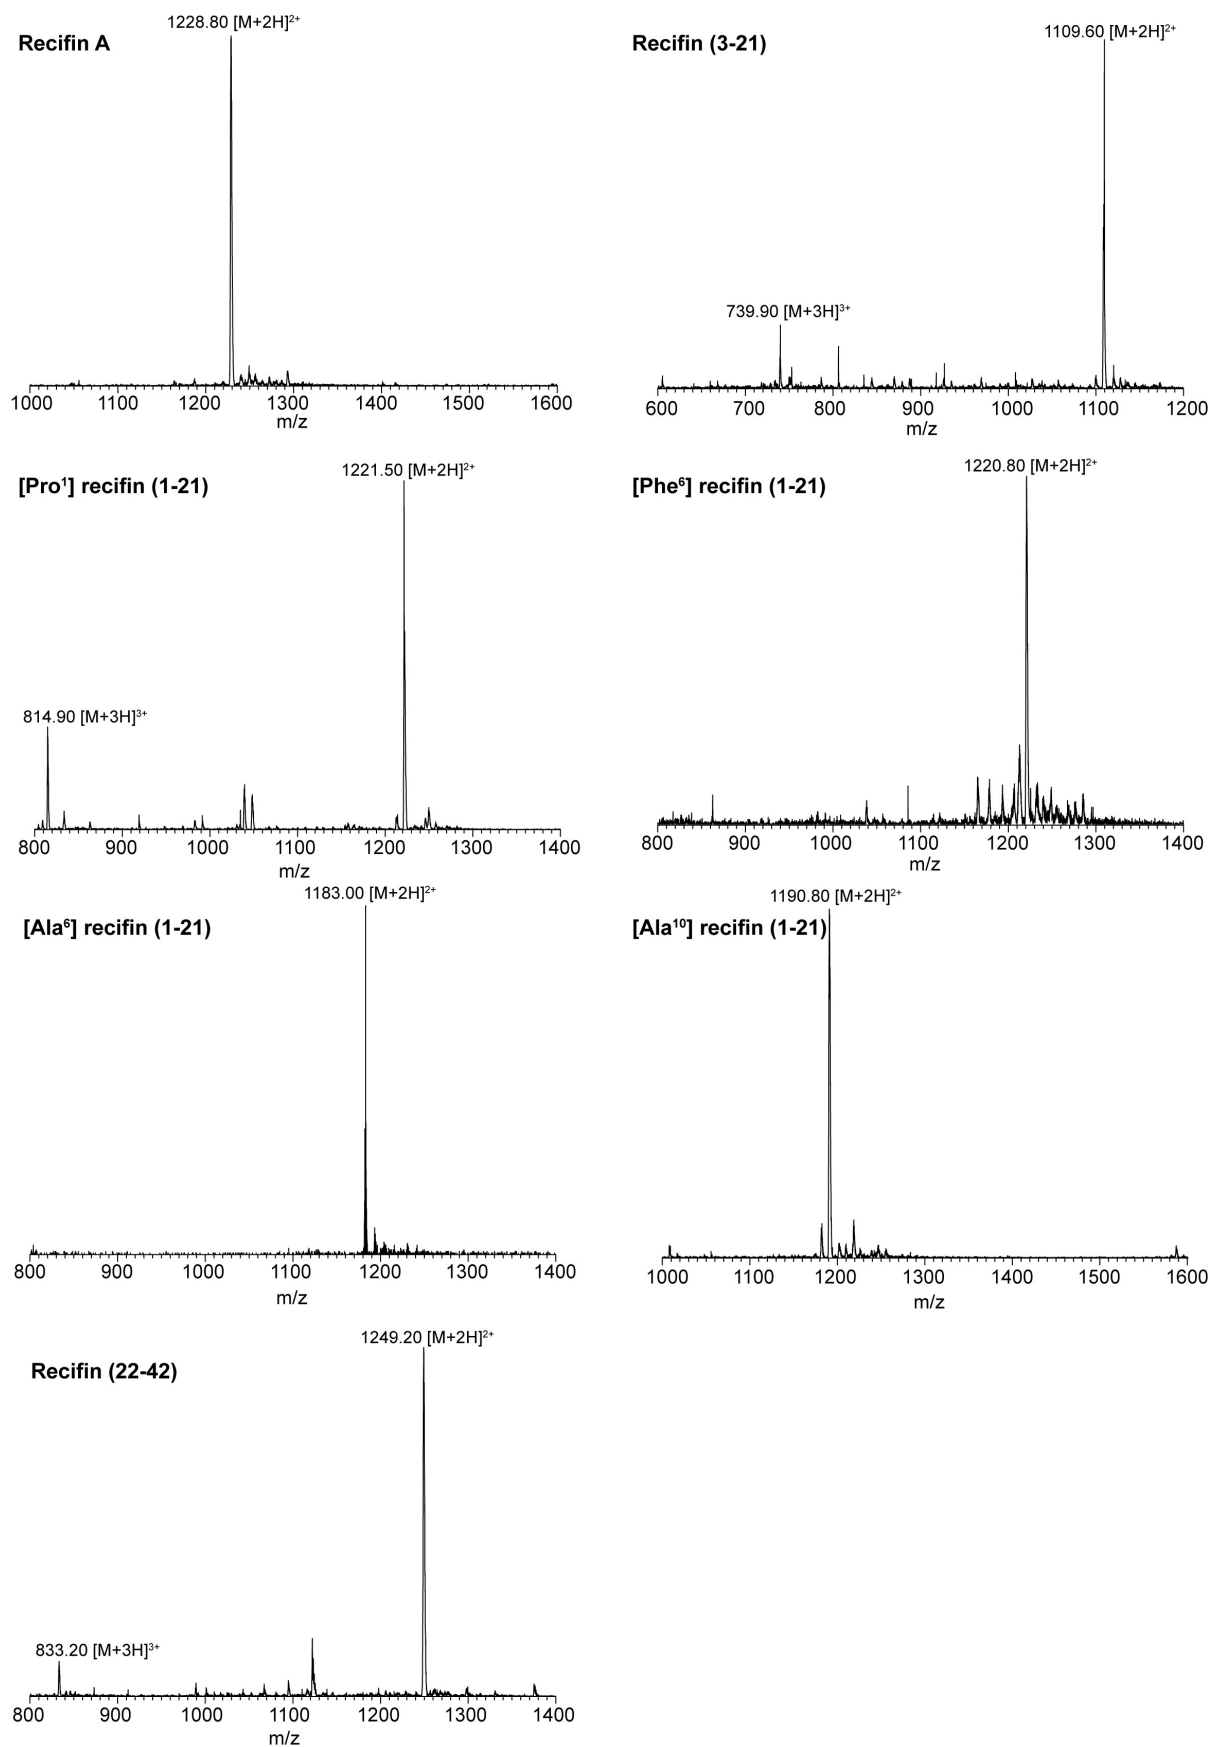

**Figure S1:** ESI-MS spectra of the N-terminal hydrazide fragments (fragment 1) of recifin A and its analogues and the C-terminal cysteine fragment (fragment 2) used for native chemical ligation.

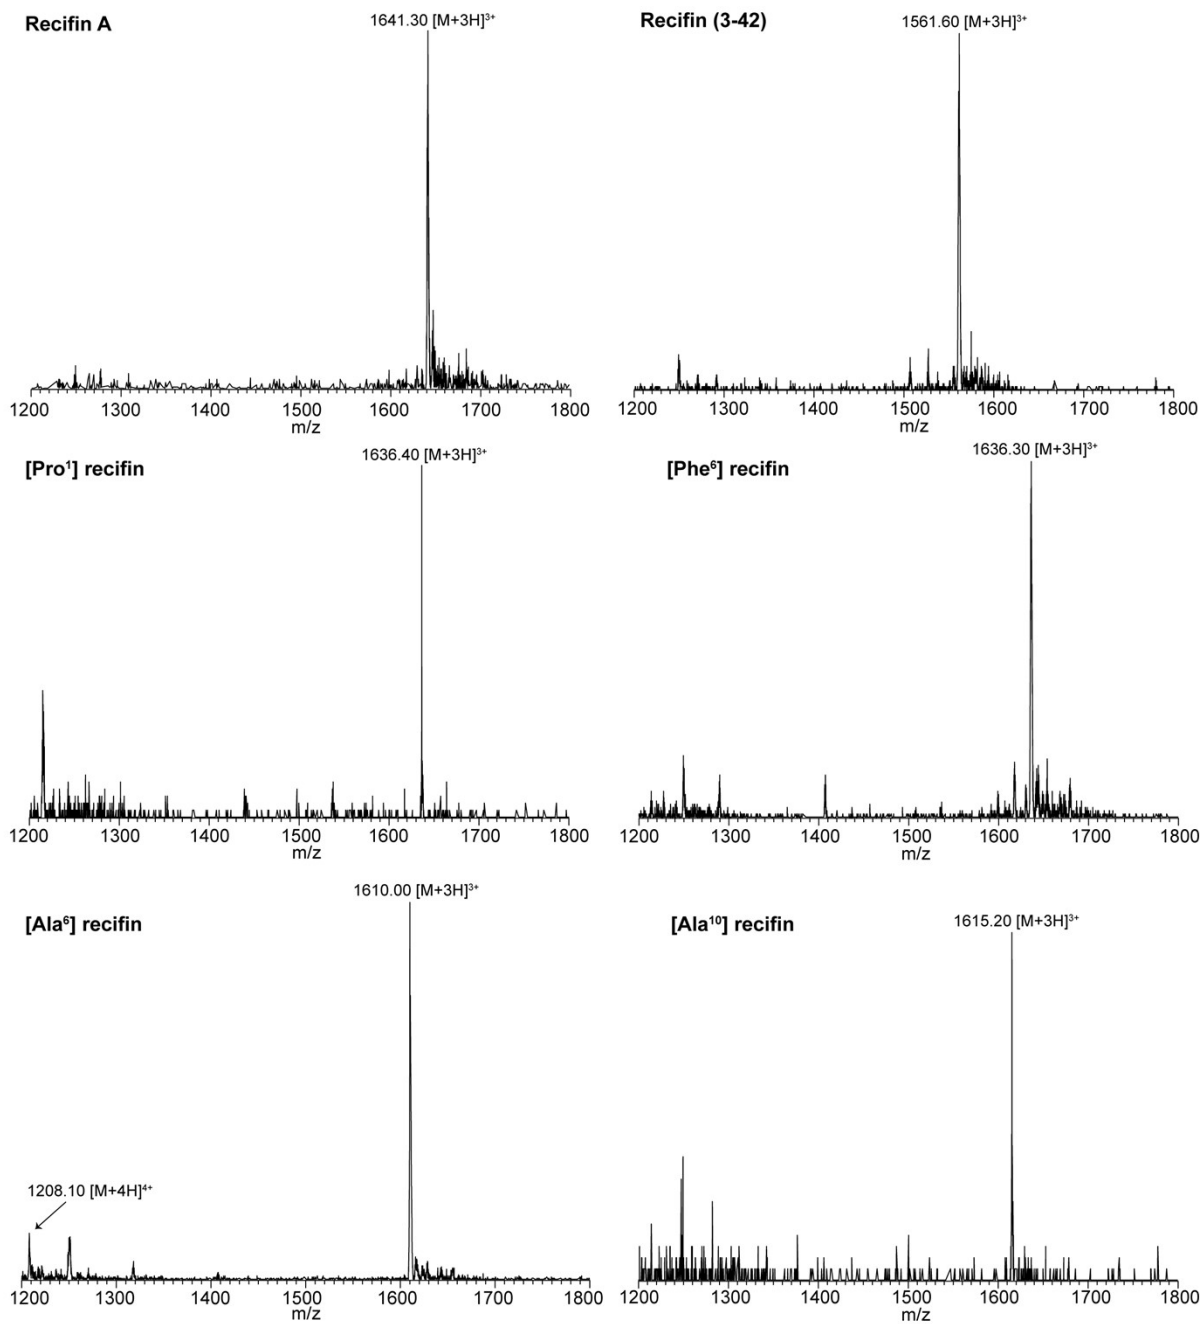

**Figure S2:** ESI-MS spectra of full length linear ligated recifin A and analogues.

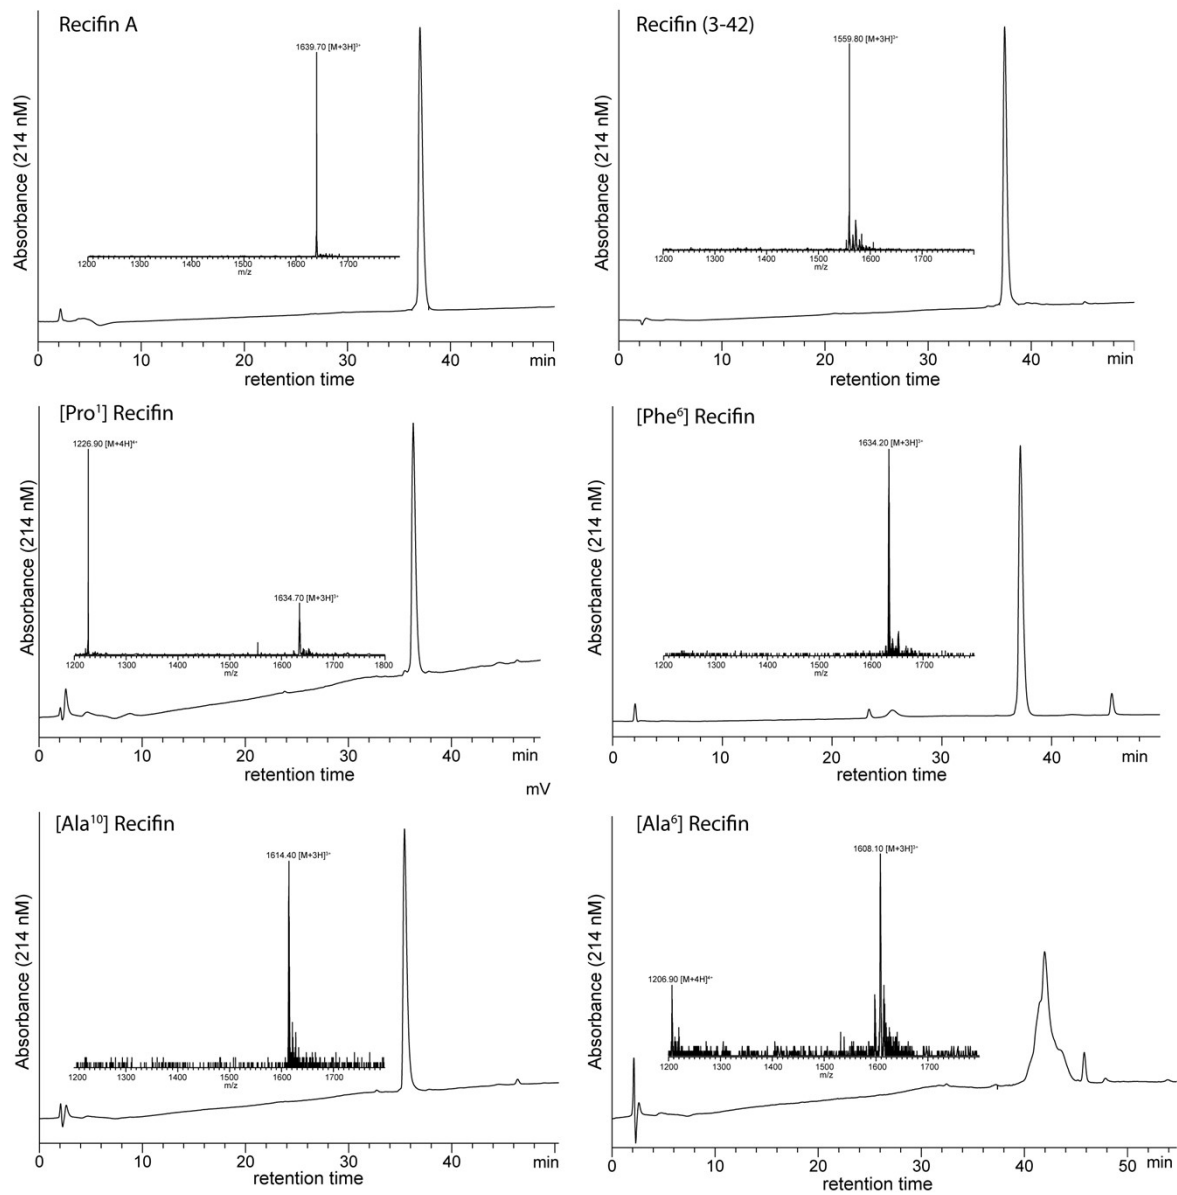

**Figure S3:** Final analytical traces and ESI-MS spectra of oxidized recifin A and analogues.

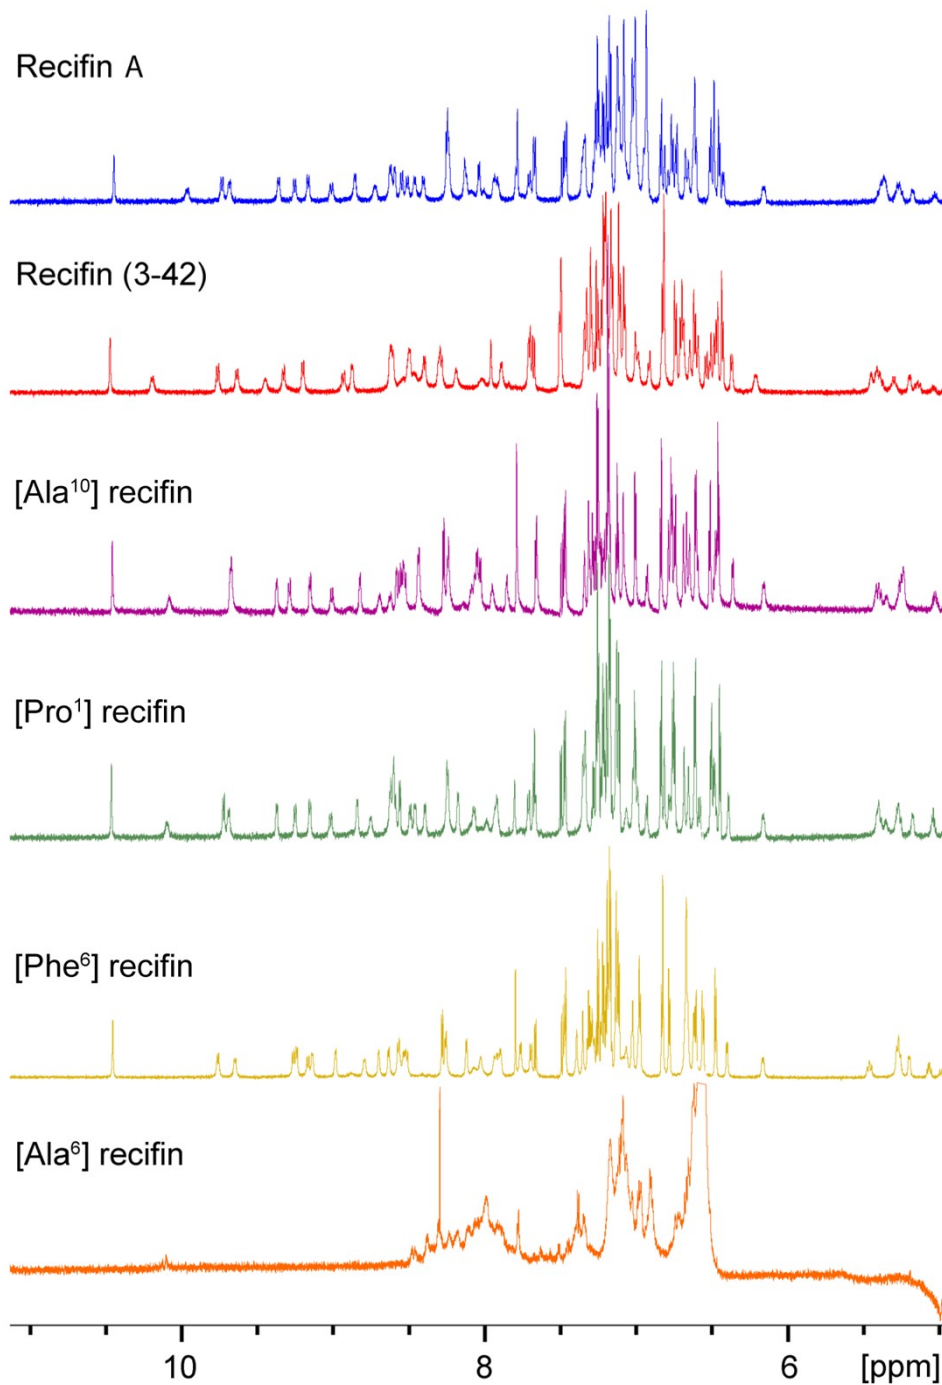

**Figure S4:** 1D <sup>1</sup>H Nuclear Magnetic Resonance spectra of recifin A and analogues in 90/10% H<sub>2</sub>O/D<sub>2</sub>O at 298 K acquired on a Bruker Avance III 900 MHz spectrometer equipped with a cryoprobe. The majority of the purified peptides gave dispersed <sup>1</sup>H NMR spectra with sharp lines, implying that they adopt ordered structures in solution. However, the [Ala<sup>6</sup>] recifin analogue spectra appeared broad and lacked dispersion of the HN signals indicating that the peptide is misfolded. Thus, while substitution of Tyr<sup>6</sup> with Phe is well tolerated, incorporating an alanine at position 6 prevents folding of the peptide.

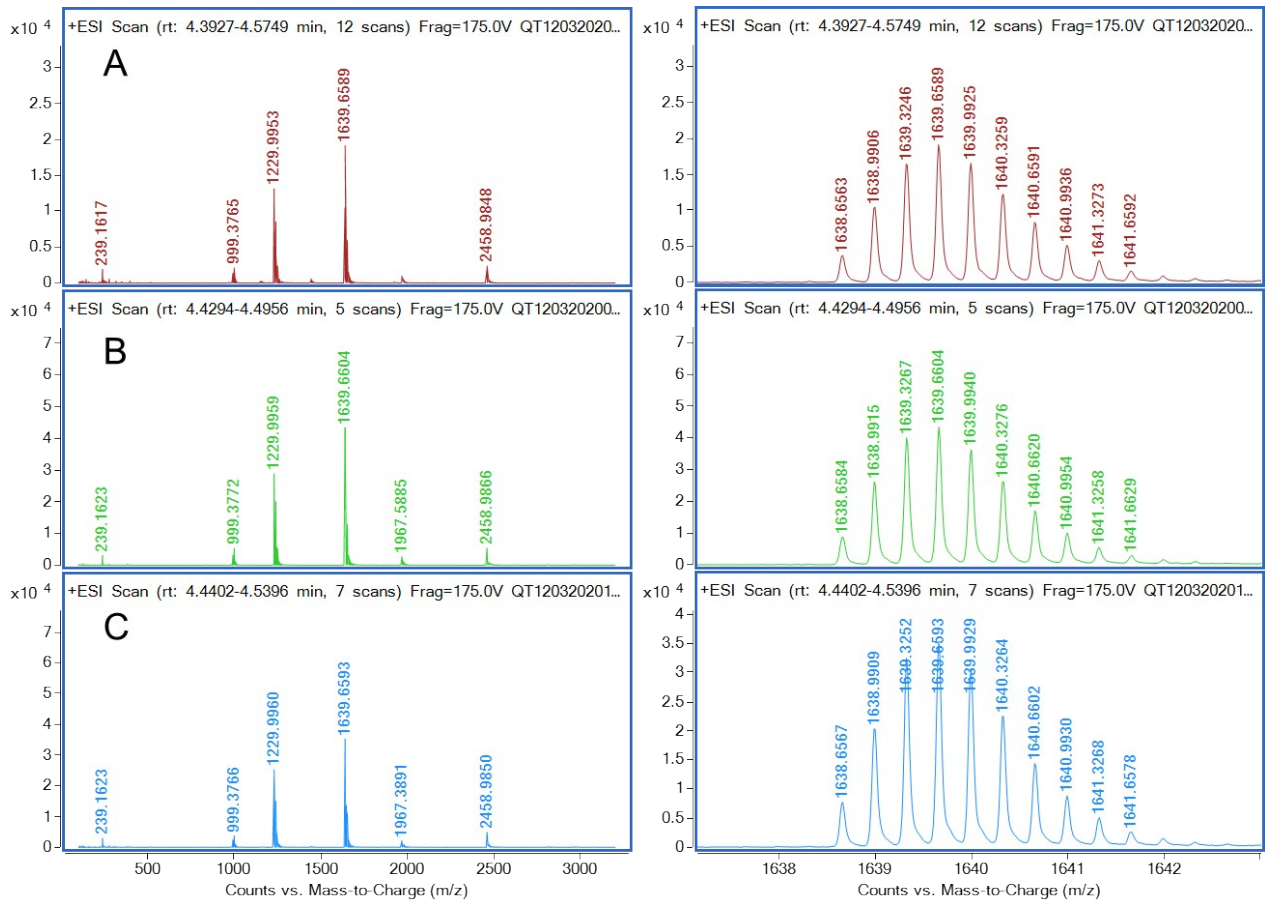

**Figure S5:** Molecular charge envelopes for **A)** native and **B)** synthetic recifin A and **C)** native and synthetic recifin A co-elution experiments showing identical ionization patterns and distribution of charge states with near identical isotopic distribution  $[M+3H]^{3+}$ .

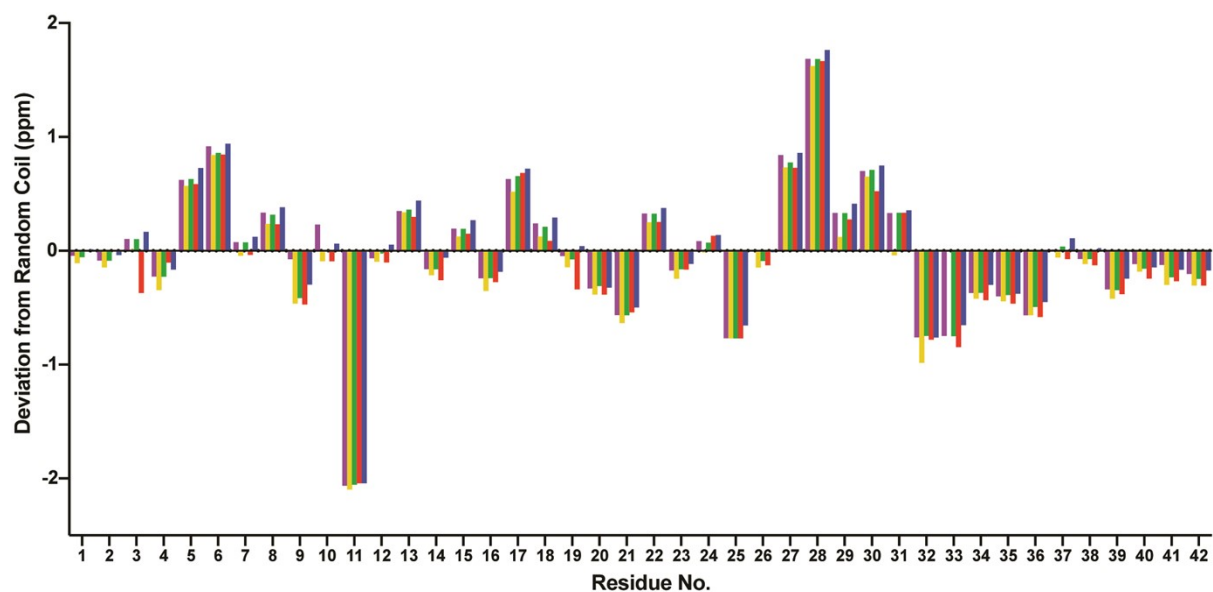

**Figure S6:** Secondary  $H\alpha$  chemical shifts compared to random coil values<sup>[15]</sup> highlighting positive stretches of secondary chemical shifts indicative of  $\beta$ -sheets combined with negative stretches suggesting  $\alpha$ -helices. Recifin A in blue, recifin (3–42) in red, [Pro<sup>1</sup>] recifin in purple, [Phe<sup>6</sup>] recifin in green and [Ala<sup>10</sup>] recifin in yellow. Secondary  $H\alpha$  chemical shifts for recifin (3–42) at residue number 1 and 2 was set to 0 for the truncated version.

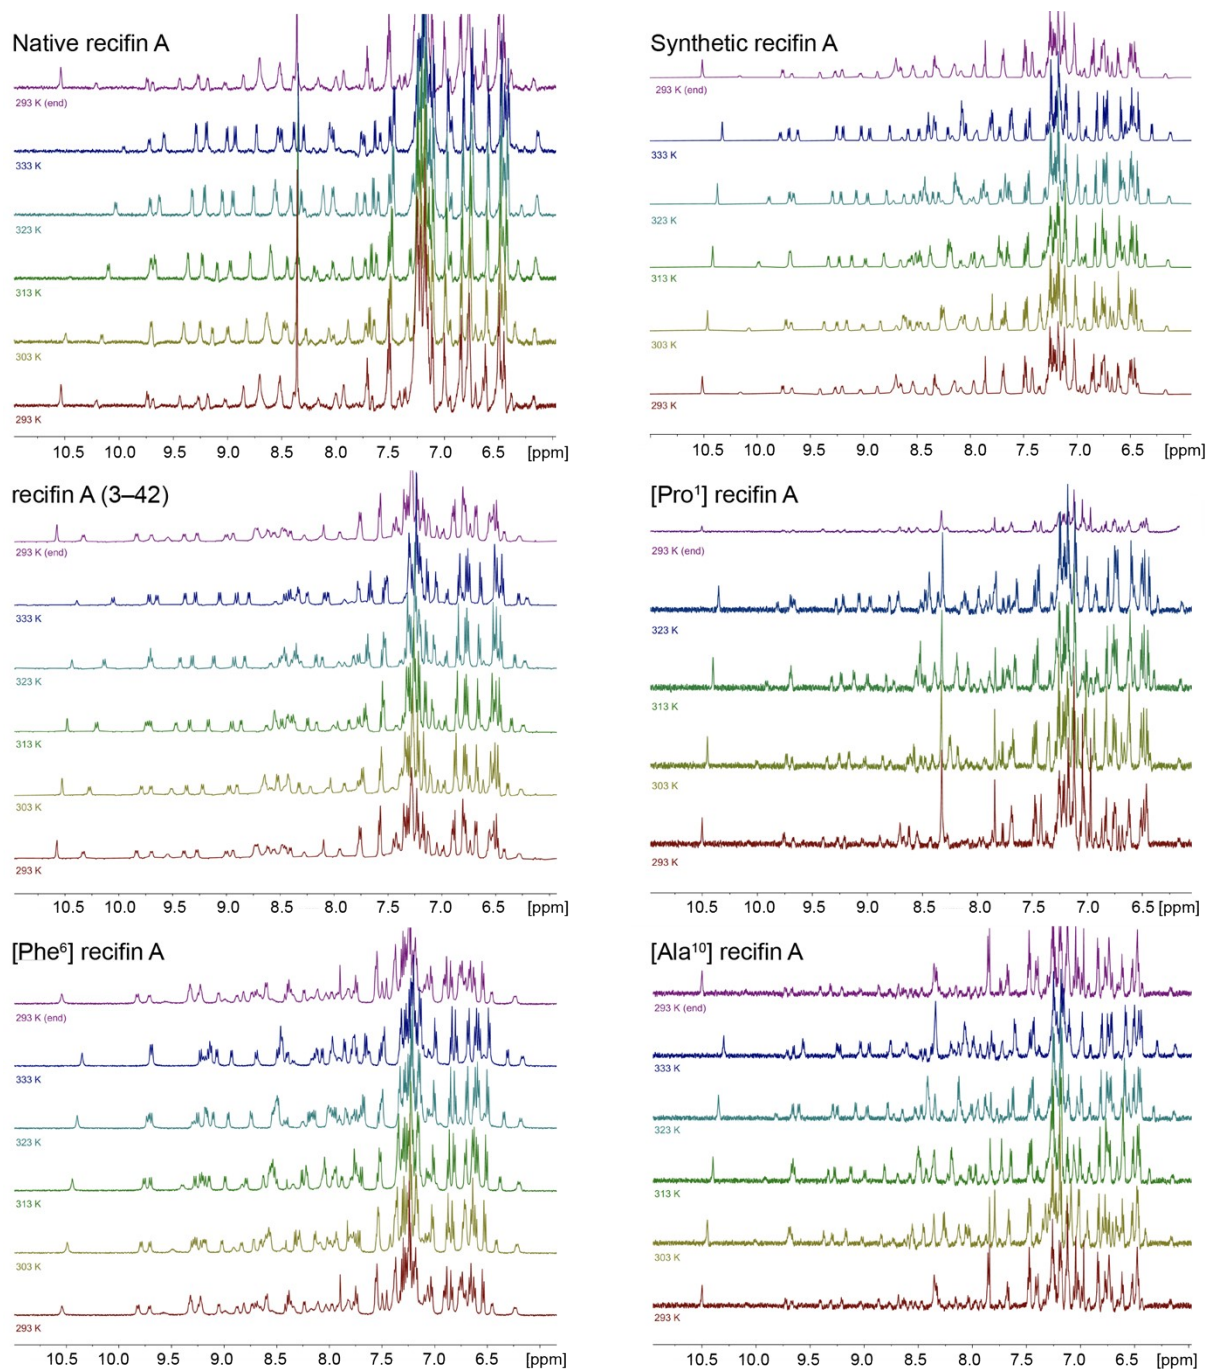

**Fig S7:** Thermal stability (293–333 K) of native recifin A, synthetic recifin A and synthetic recifin A analogues carried out using nuclear magnetic resonance in 90/10% H<sub>2</sub>O/D<sub>2</sub>O, pH5.8–7.9, on a 500 or 700 MHz Bruker Avance III equipped with a cryo probe.



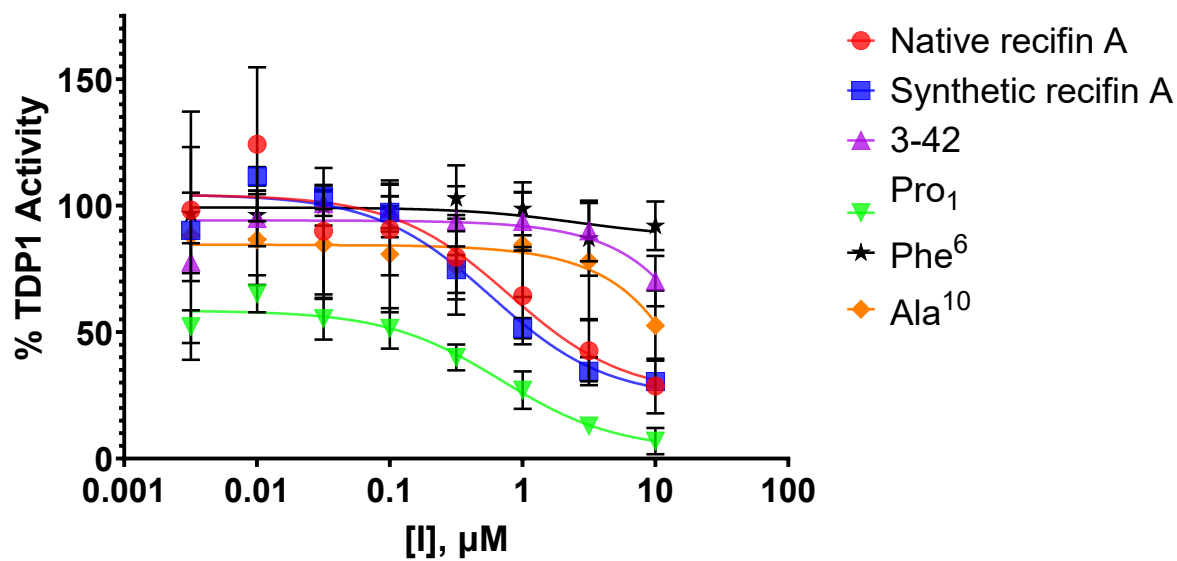

**Figure S8: Biochemical activity of native recifin A, synthetic recifin A and structural analogues.** Peptides were tested for inhibition of TDP1 activity in a FRET-based assay system. Reactions were conducted in triplicate, and data were normalized to no enzyme (0% activity) and non-inhibited enzyme (100% activity) assay controls. Concentration-response curves and  $IC_{50}$  values (see main text, Table 1) were produced with GraphPad Prism software.

**Table S1:** Expected and observed molecular mass (Da) of synthesized recifin A and analogues

| Peptide                      | Hydrazide fragment               |                                  | Ligated peptide                  |                                  | Oxidized peptide                 |                                  |
|------------------------------|----------------------------------|----------------------------------|----------------------------------|----------------------------------|----------------------------------|----------------------------------|
|                              | Expected<br>[M+2H] <sup>2+</sup> | Observed<br>[M+2H] <sup>2+</sup> | Expected<br>[M+3H] <sup>3+</sup> | Observed<br>[M+3H] <sup>3+</sup> | Expected<br>[M+3H] <sup>3+</sup> | Observed<br>[M+3H] <sup>3+</sup> |
| Recifin A                    | 1229.34                          | 1228.80                          | 1641.74                          | 1641.30                          | 1639.74                          | 1639.70                          |
| Recifin (3-42)               | 1109.22                          | 1109.60                          | 1561.74                          | 1561.60                          | 1559.74                          | 1559.80                          |
| [Pro <sup>1</sup> ] recifin  | 1222.32                          | 1221.50                          | 1637.15                          | 1636.40                          | 1635.15                          | 1634.70                          |
| [Phe <sup>6</sup> ] recifin  | 1221.33                          | 1220.80                          | 1636.47                          | 1636.30                          | 1634.47                          | 1634.20                          |
| [Ala <sup>6</sup> ] recifin  | 1183.28                          | 1183.00                          | 1611.11                          | 1610.00                          | 1609.11                          | 1608.10                          |
| [Ala <sup>10</sup> ] recifin | 1191.28                          | 1190.80                          | 1616.44                          | 1615.20                          | 1614.44                          | 1613.80                          |

**Table S2:** NMR distance and dihedral statistics for [Phe<sup>6</sup>] recifin

|                                                      | [Phe <sup>6</sup> ] recifin |
|------------------------------------------------------|-----------------------------|
| <b>Distance restraints</b>                           |                             |
| Intra residual ( $ i-j  = 0$ )                       | 151                         |
| Sequential ( $ i-j  = 1$ )                           | 170                         |
| Medium range ( $1 <  i-j  < 5$ )                     | 117                         |
| Long range ( $ i-j  \geq 5$ )                        | 180                         |
| Hydrogen bonds                                       | 24                          |
| Total                                                | 642                         |
| <b>Dihedral angle restraints</b>                     |                             |
| $\Phi$                                               | 18                          |
| $\Psi$                                               | 15                          |
| Total                                                | 33                          |
| <b>Energies (kcal/mol, mean <math>\pm</math> SD)</b> |                             |
| Overall                                              | -1374.73 $\pm$ 36.81        |
| Bonds                                                | 23.26 $\pm$ 0.93            |
| Angles                                               | 65.42 $\pm$ 4.63            |
| Improper                                             | 31.43 $\pm$ 3.52            |
| Dihedral                                             | 189.78 $\pm$ 1.67           |
| Van der Waals                                        | -189.80 $\pm$ 5.84          |
| Electrostatic                                        | -1496.15 $\pm$ 35.99        |
| NOE (experimental)                                   | 0.36 $\pm$ 0.04             |
| Constrained dihedrals (experimental)                 | 0.96 $\pm$ 0.36             |
| <b>Atomic RMSD (Å)</b>                               |                             |
| Mean global backbone (1-42)                          | 0.92 $\pm$ 0.26             |
| Mean global heavy atoms (1-42)                       | 1.52 $\pm$ 0.26             |
| Mean global backbone (3-17,27-42)                    | 0.39 $\pm$ 0.09             |
| Mean global heavy atoms (3-17,27-42)                 | 0.92 $\pm$ 0.10             |
| <b>MolProbity</b>                                    |                             |
| Clash Score, all atoms                               | 11.74 $\pm$ 2.94            |
| Poor rotamers                                        | 0 $\pm$ 0                   |
| Favored rotamers (%)                                 | 94.05 $\pm$ 3.23            |
| Ramachandran Outliers (%)                            | 0 $\pm$ 0                   |
| Ramachandran Favored (%)                             | 92.05 $\pm$ 3.32            |
| MolProbity score                                     | 2.02 $\pm$ 0.14             |
| MolProbity score percentile                          | 74.26 $\pm$ 7.20            |
| <b>Violations from experimental restraints</b>       |                             |
| NOE violations exceeding 0.2 Å                       | 0                           |
| Dihedral violations exceeding 2.0°                   | 0                           |
